# Supplementary material for: Probing and Enhancing Ligand-Mediated Active Targeting of Tumors Using Sub-5 nm Ultrafine Iron Oxide Nanoparticles
Source: PubMed Central journal article supplement (PMC7052897; doi:10.7150/thno.39560), 2020-01-22
Supplement: thnov10p2479s1.pdf [file thnov10p2479s1.pdf]

# Probing and Enhancing Ligand-Mediated Active Targeting of Tumors Using Sub-5 nm Ultrafine Iron Oxide Nanoparticles

*Yaolin Xu<sup>1</sup>, Hui Wu<sup>1</sup>, Jing Huang<sup>1,2</sup>, Weiping Qian<sup>3</sup>, Deborah E. Martinson<sup>4</sup>, Bing Ji<sup>1</sup>,  
Yuancheng Li<sup>1</sup>, Yongqiang A. Wang<sup>5</sup>, Lily Yang<sup>3</sup> and Hui Mao<sup>1,\*</sup>*

<sup>1</sup>Department of Radiology and Imaging Sciences, Emory University School of Medicine,  
Atlanta, Georgia, USA

<sup>2</sup>Boston Children's Hospital, Harvard Medical School, Boston, Massachusetts, USA

<sup>3</sup>Department of Surgery, Emory University School of Medicine, Atlanta, Georgia, USA

<sup>4</sup>Integrated Cellular Imaging Core, Emory University, Atlanta, Georgia, USA

<sup>5</sup>Ocean Nanotech, LLC, San Diego, California, USA

Corresponding Author: Hui Mao, Department of Radiology and Imaging Sciences, Emory  
University, 1841 Clifton Road, Atlanta, Georgia 30329, USA, E-mail: [hmao@emory.edu](mailto:hmao@emory.edu).

## SUPPORTING INFORMATION

**Materials and chemicals.** All the chemicals were used without further purification. Ferric nitrite ( $\text{FeNO}_3 \cdot 9\text{H}_2\text{O}$ , 98%), sodium oleate (NaOA, 97%), hexane, ethanol, 1-octadecene (90%), chloroform, dimethylformamide (DMF, 99%), D-(+)-glucose, dimethyl sulfoxide (DMSO, 90%), ammonium hydroxide ( $\text{NH}_4\text{OH}$ , ACS grade), sodium bicarbonate ( $\text{NaHCO}_3$ ) buffer (0.1 M, pH=8.5), fluorescein isothiocyanate (FITC), tetramethylrhodamine (TRITC), 1-ethyl-3-(3-dimethylaminopropyl)carbodiimide (EDC), n-hydroxysuccinimide (Sulfo-NHS), 4',6-diamidino-2-phenylindole (DAPI), paraformalin, potassium ferrocyanide (II) trihydrate ( $\text{K}_4\text{Fe}(\text{CN})_6$ ), nuclear fast red solution, hematoxylin and eosin Y solution, and optimal cutting temperature compound (OCT) were purchased from Sigma-Aldrich (St. Louis, MO, USA). Oleic-acid coated iron oxide nanoparticles (IONPs) with an averaged core size of 30 nm, activation buffer (pH = 5.5) and coupling buffer (pH = 8.5) were purchased from Ocean Nanotech LLC (San Diego, CA, USA). Phosphate-buffered saline (PBS), fetal bovine serum (FBS), transferrin (Tf), RPMI-1640 medium, Dulbecco's Modified Eagle Medium (DMEM), trypsin-EDTA, penicillin-streptomycin solution, and 3-(4,5-dimethylthiazol-2-yl)-2,5-diphenyltetrazolium bromide (MTT) kit were purchased from Sigma-Aldrich (St. Louis, MO, USA). Amicon Ultra-4 centrifugal filters (50 kDa) were purchased from Millipore (Burlington, MA, USA). Balb/c mice were ordered from Harlan Laboratories (Indianapolis, IN, USA).

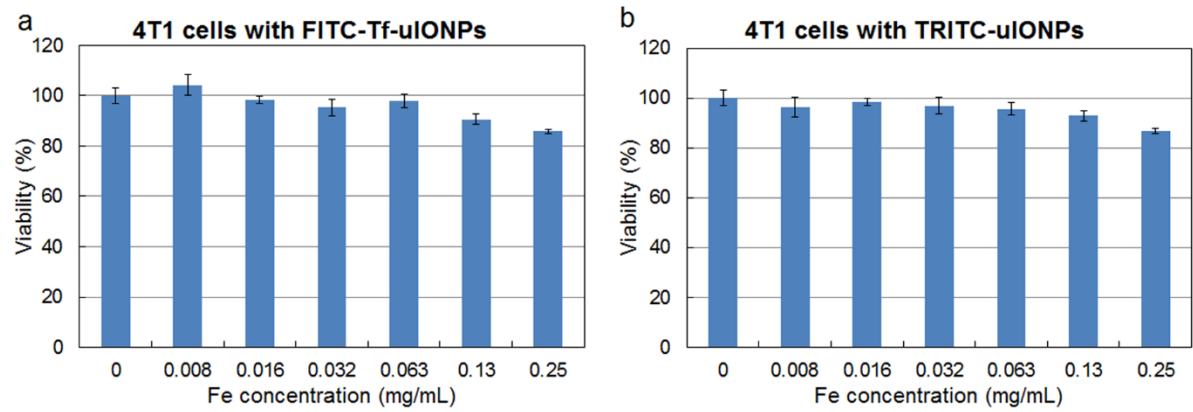

**Figure S1.** Cell viability studies of 4T1 breast cancer cells treated with (a) FITC-Tf-uIONPs and (b) TRITC-uIONPs;

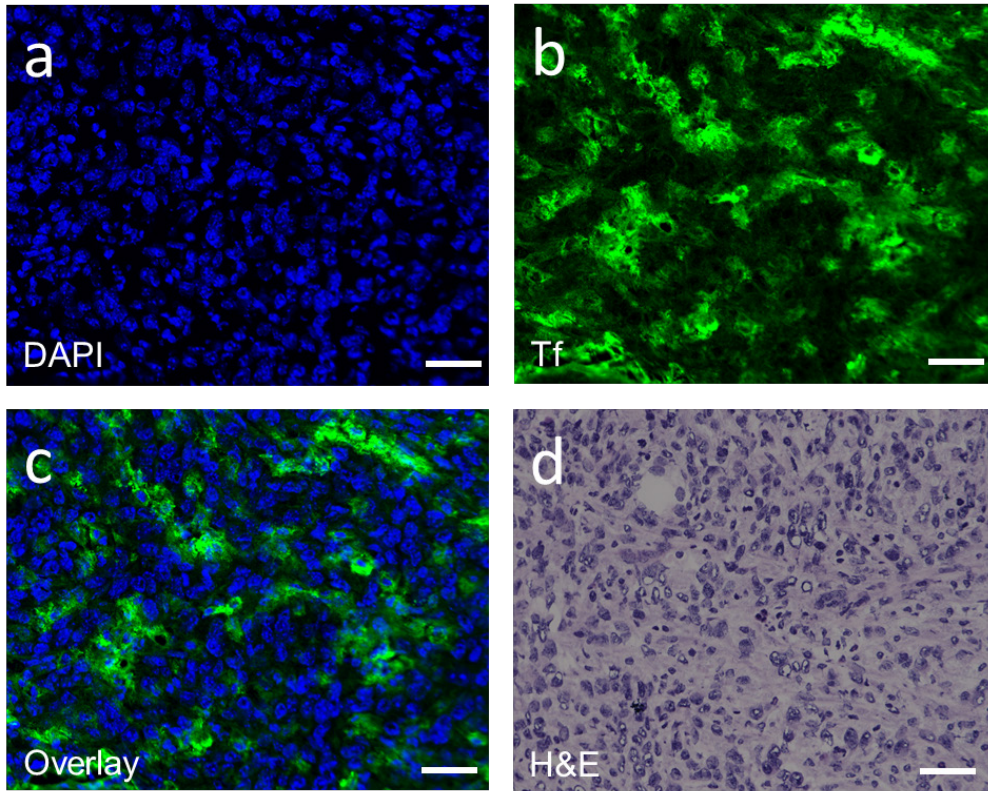

**Figure S2.** Confocal fluorescence images of a selected 4T1 tumor section co-stained with FITC labeled Tf. **a:** DAPI for nuclei, **b:** Tf; **c:** merged image with DAPI and Tf, **(d)** histological H&E staining from a tumor section adjacent to the section used for fluorescence imaging. The scale bar for all images is 100  $\mu\text{m}$ .

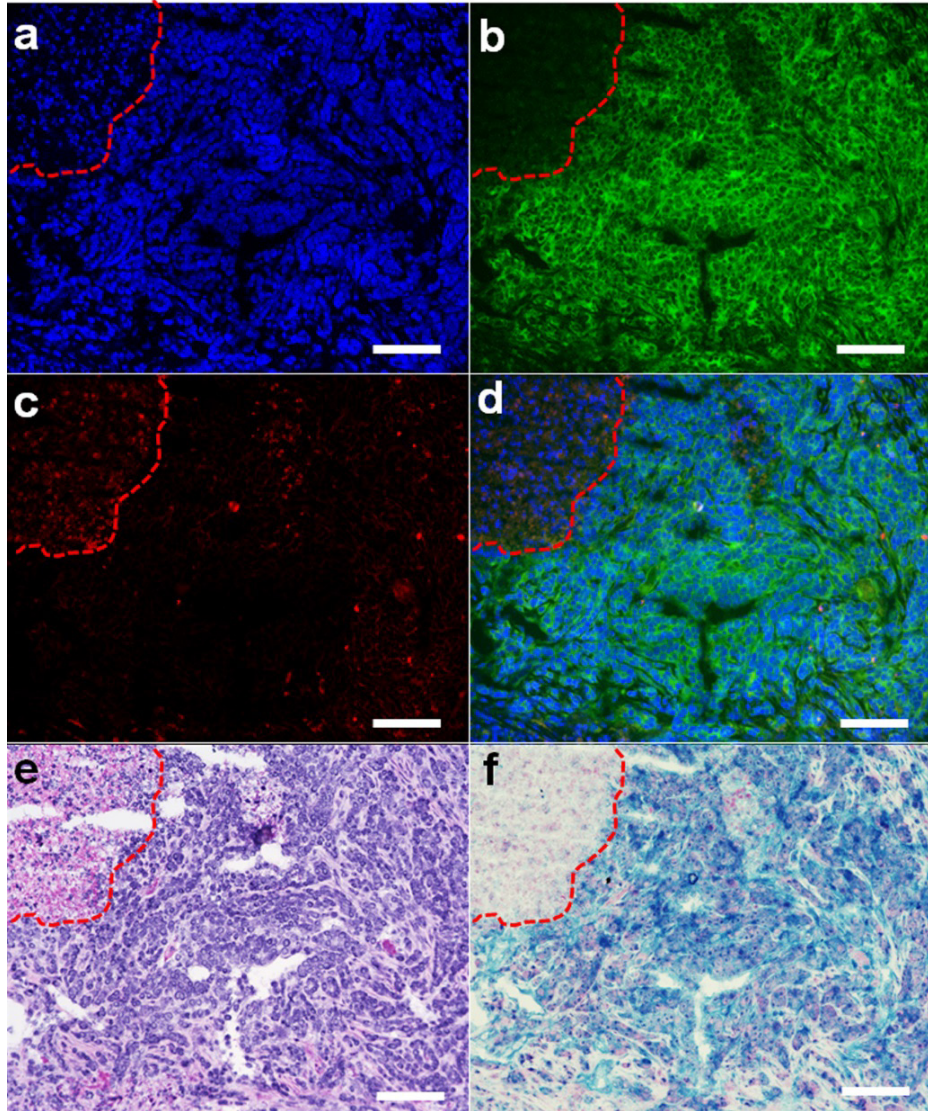

**Figure S3.** Confocal fluorescence images of a selected tumor section co-stained with FITC-Tf-uIONPs and TRITC-uIONPs. **a:** DAPI for nuclei, **b:** FITC-Tf-uIONPs (green), **c:** TRITC-uIONPs (red), and **d:** merged image (DAPI + FITC-Tf-uIONPs + TRITC-uIONPs); **(e)** histological H&E staining from a tumor section adjacent to the section used for fluorescence imaging. The dashed red lines outline the tumor regions with high cellularity (mainly co-localized with active targeting FITC-Tf-uIONPs) from the tumor stromal regions (mainly co-localized with non-targeting TRITC-uIONPs); **(f)** Prussian blue staining for iron on the same tumor section used for fluorescence imaging. The scale bar for all images is 200  $\mu\text{m}$ .

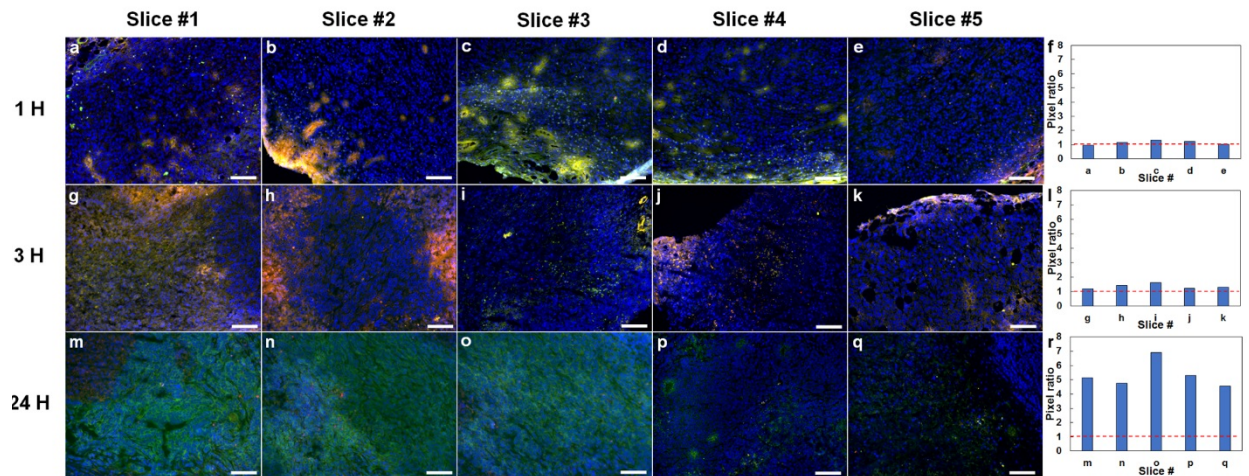

**Figure S4.** Merged confocal fluorescence images (DAPI + FITC-Tf-uIONPs + TRITC-uIONPs) of selected tumor slices collected from mice receiving co-injection of active-targeting FITC-Tf-uIONPs and non-targeting TRITC-uIONPs with the core size of 3 nm. Images were taken at different time points after co-injection of FITC-Tf-uIONPs and TRITC-uIONPs (**a-e**: 1 hour; **g-k**: 3 hours; **m-q**: 24 hours). The pixels of different fluorescent signals, *i.e.*, FITC-Tf-uIONPs (green) and TRITC-uIONPs (red), were segmented from each image and counted using an in-house program. Pixel ratios, defined as the pixel intensity of FITC-Tf-uIONPs over pixel intensity of TRITC-uIONPs, are plotted to demonstrate the time-dependent change of the ratios between active-targeting FITC-Tf-uIONPs and non-targeting TRITC-uIONPs (**f**: 1 hour, **l**: 3 hours, and **r**: 24 hours). The scale bar for all images is 200  $\mu\text{m}$ .

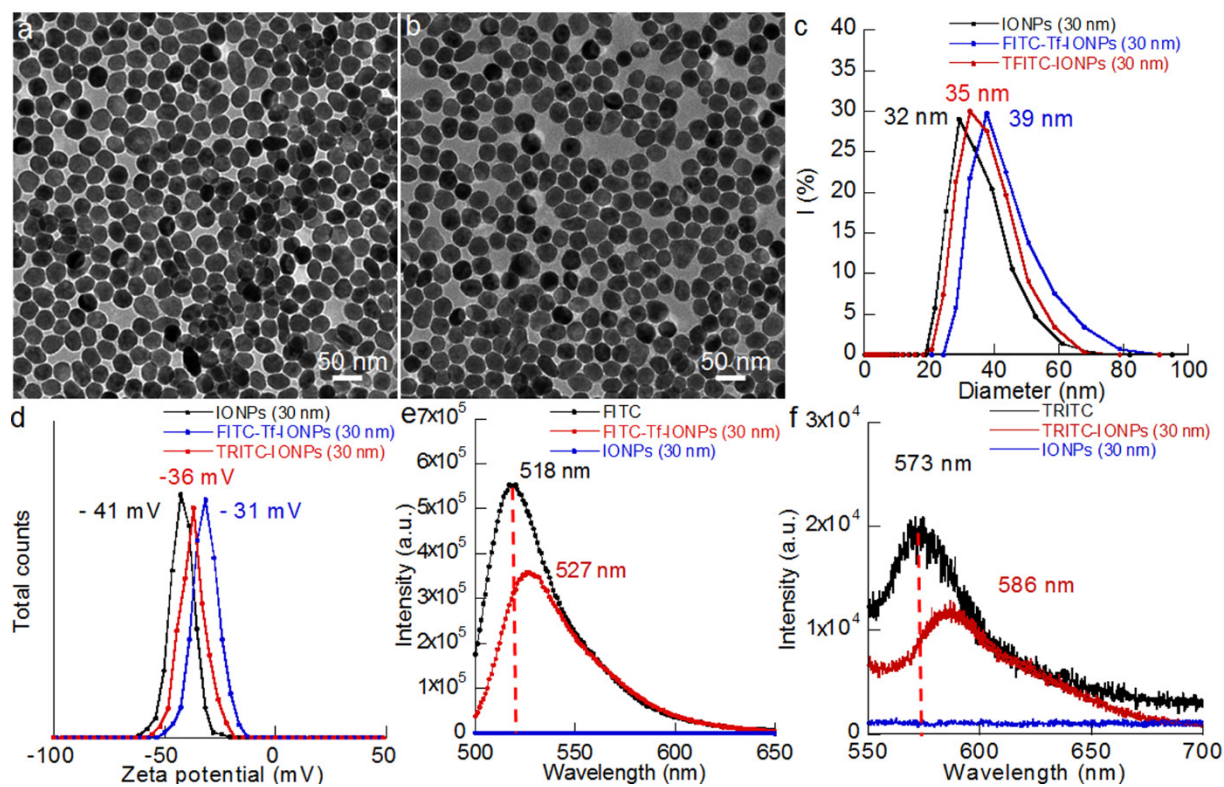

**Figure S5.** Characterizations of TRITC-IONPs and FITC-Tf-IONPs with the core size of 30 nm.

TEM images of (a) TRITC-IONPs, and (b) FITC-Tf-IONPs; The size distribution (c) and zeta potential (d) of IONPs measured by DLS; Fluorescent emission spectra (e) and (f) of free dye, IONPs, and FITC-Tf or TRITC conjugated IONPs.

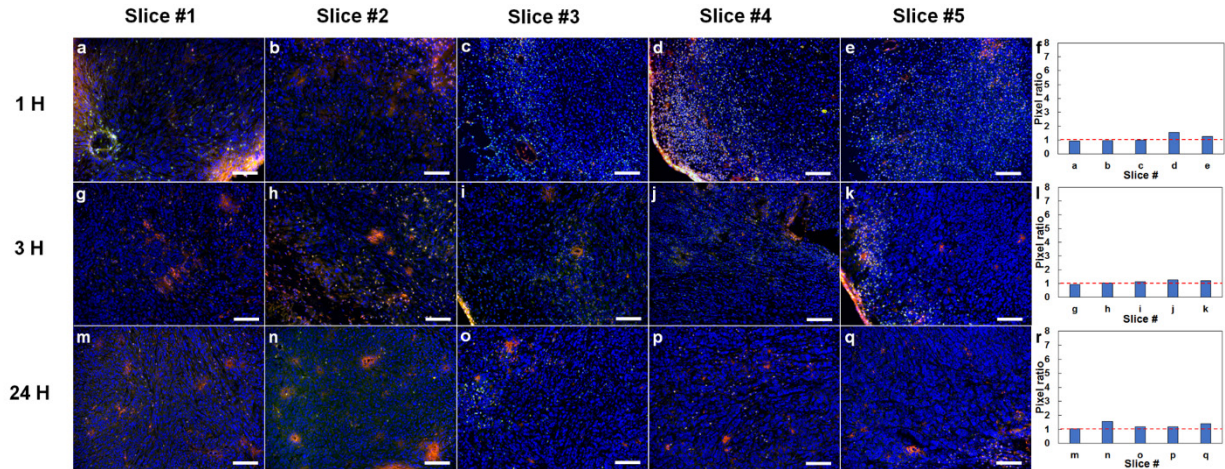

**Figure S6.** Merged fluorescent images of tumor sections collected from mice receiving co-injection of ligand conjugated active targeting FITC-Tf-IONPs and passive or non-targeting TRITC-IONPs with a 30 nm core size (**a-e**: 1 hour; **g-k**: 3 hours; **m-q**: 24 hours) and corresponding segmentation analysis (**f**: 1 hour, **l**: 3 hours, and **r**: 24 hours). The pixel ratio is defined as the pixel intensity of FITC-Tf-IONPs over pixel intensity of TRITC-IONPs. The scale bar for all images is 200  $\mu\text{m}$ .



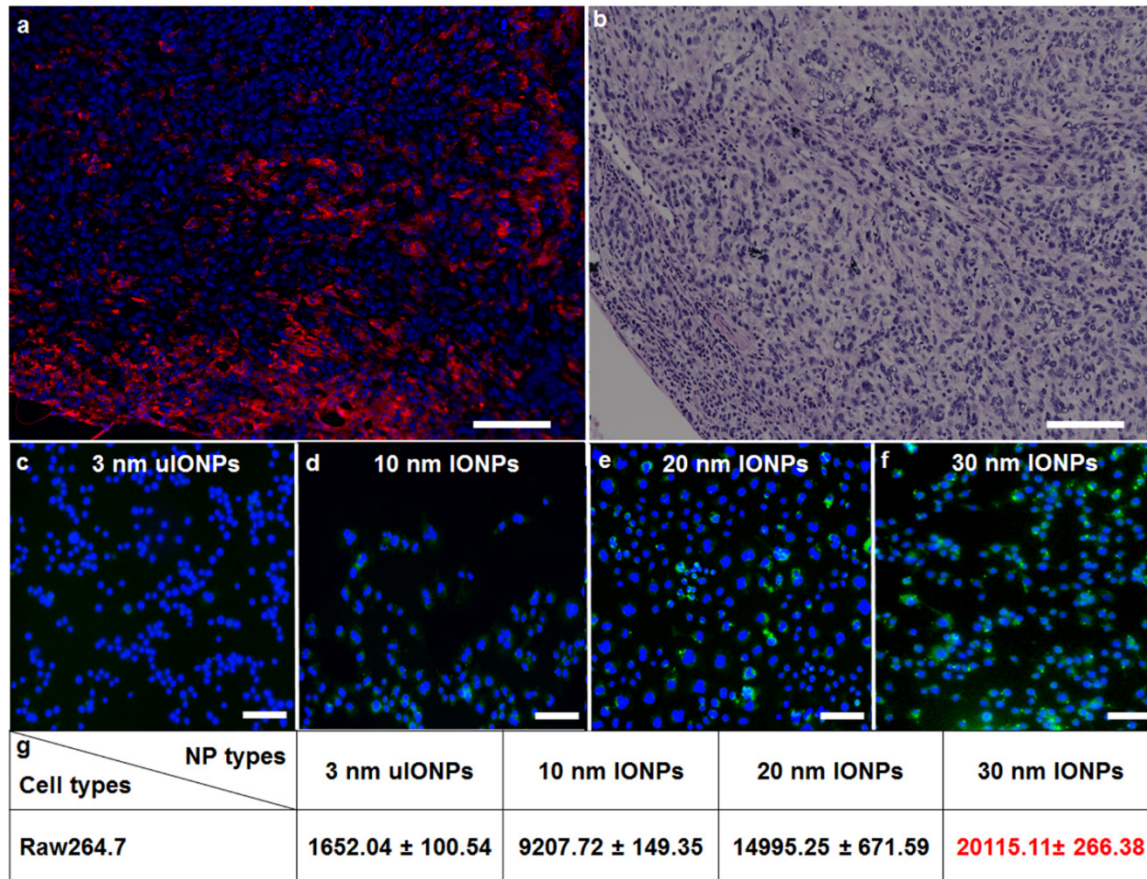

**Figure S7.** Images of a selected 4T1 tumor tissue slice stained for CD68 macrophage (a) and corresponding H&E staining (b) (scale bar: 200  $\mu$ m); Fluorescent images of mouse macrophage RAW264.7 cells treated with FITC labeled IONPs of different sizes (c-f) (scale bar: 20  $\mu$ m), table summarizing pixel reading of different IONPs from fluorescent images to show the level of macrophage uptake (g).
